# Supplementary material for: Synthesis and investigation of the electrical properties of novel liquid-crystal phthalocyanines bearing triple branched alkylthia chains
Source: Royal Society of Chemistry journal article supplement (doi:10.1039/d0nj00678e), 2020-01-01
Supplement: d0nj00678e1.pdf [file d0nj00678e1.pdf]

## Electronic Supplementary Information

### Synthesis and Investigation of Electrical Properties of Novel Liquid-Crystal Phthalocyanines

Betül Canımkuşbey,<sup>\*a,b</sup> Mustafa Can Taşkan,<sup>c</sup> Sevde Demir,<sup>c</sup> Ercan Duygulu,<sup>c</sup> Devrim Atilla,<sup>c</sup>

Fatma Yuksel<sup>\*c</sup>

<sup>a</sup>*S. Şerefeddin Health Services Vocational School, Amasya University, Amasya, 05100,*

*Turkey.*

<sup>b</sup>*Central Research Laboratory, Amasya University, 05100, Amasya, Turkey*

<sup>c</sup>*Department of Chemistry, Faculty of Science, Gebze Technical University, Gebze, Kocaeli,*

*Turkey.*

\* Author for correspondence:

Prof. Dr. Fatma Yuksel, Department of Chemistry, Gebze Technical University, P.O.Box: 141,  
Gebze 41400, Kocaeli, Turkey

Dr. Betül Canımkuşbey, *Central Research Laboratory, Amasya University, 05100, Amasya,*  
*Turkey*

Tel: 00 90 262 6053016

Fax: 00 90 262 6053005

E-mail: [betul.canimkurbey@amasya.edu.tr](mailto:betul.canimkurbey@amasya.edu.tr)

[fatma@gtu.edu.tr](mailto:fatma@gtu.edu.tr)

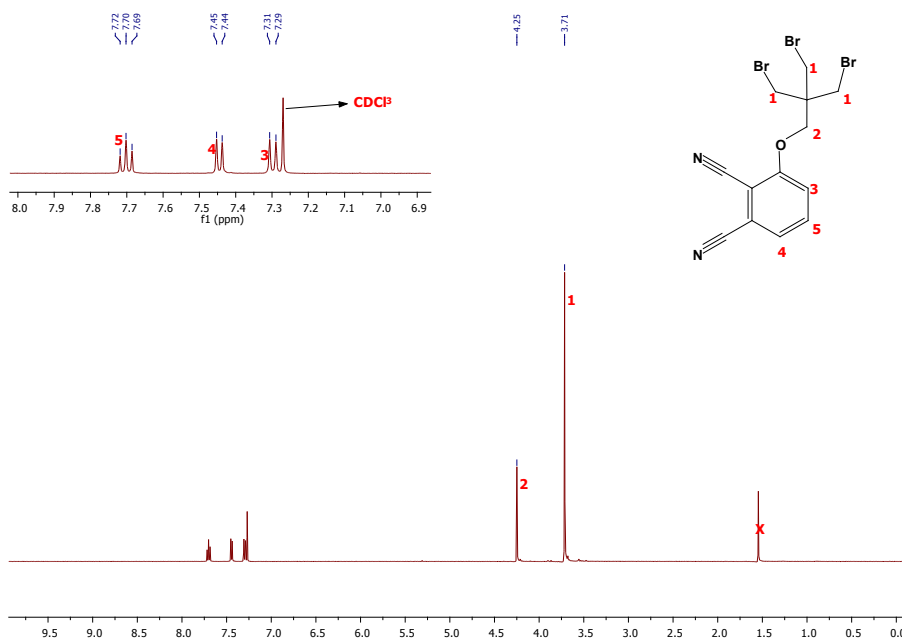

Figure S1.  $^1\text{H}$  NMR spectrum of compound 4

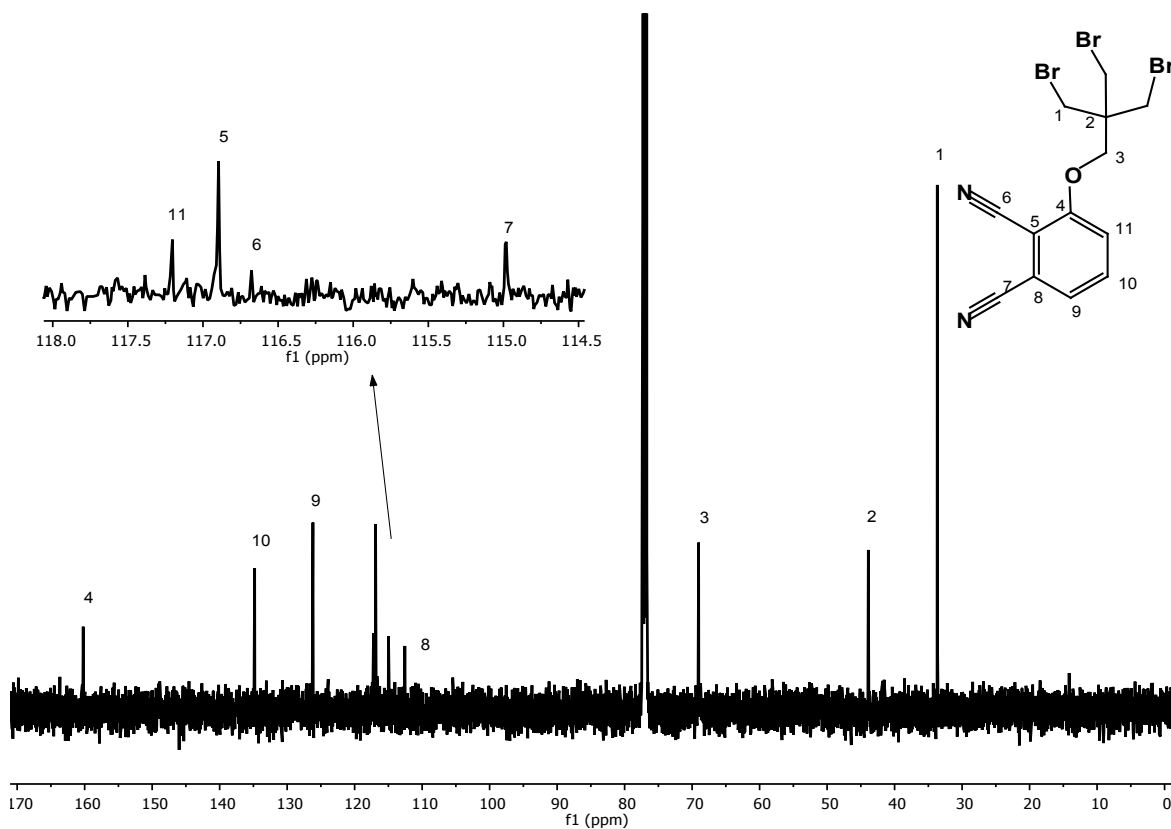

Figure S2.  $^{13}\text{C}$  NMR spectrum of compound 4

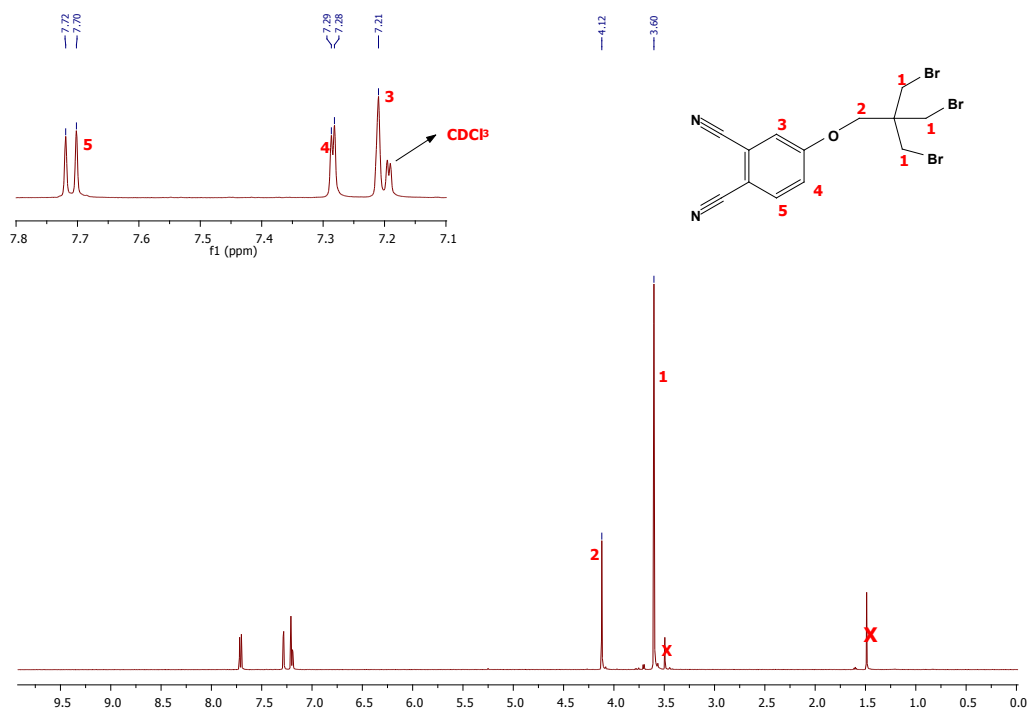

Figure S3.  $^1\text{H}$  NMR spectrum of compound 5

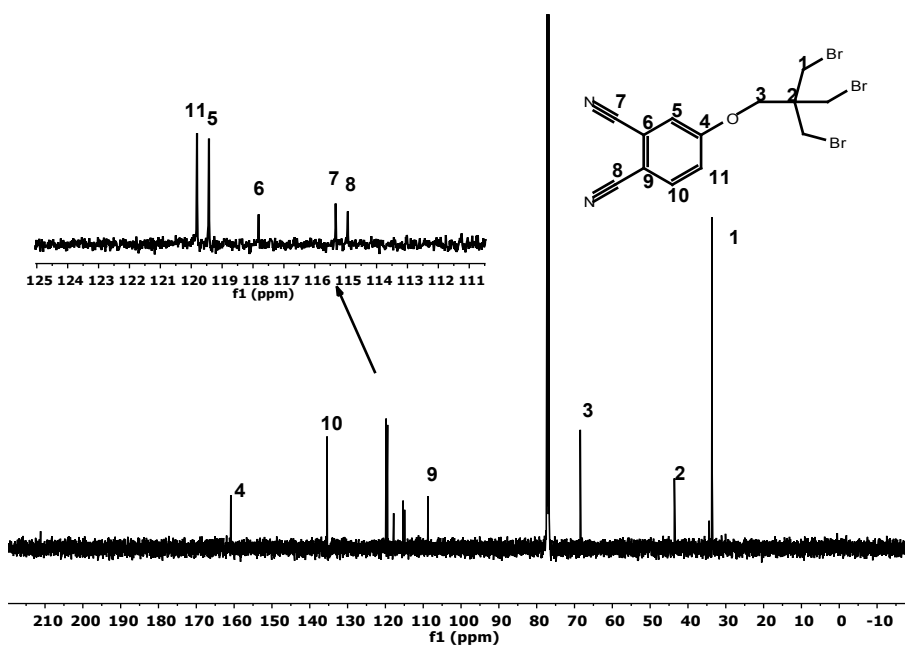

Figure S4.  $^{13}\text{C}$  NMR spectrum of compound 5

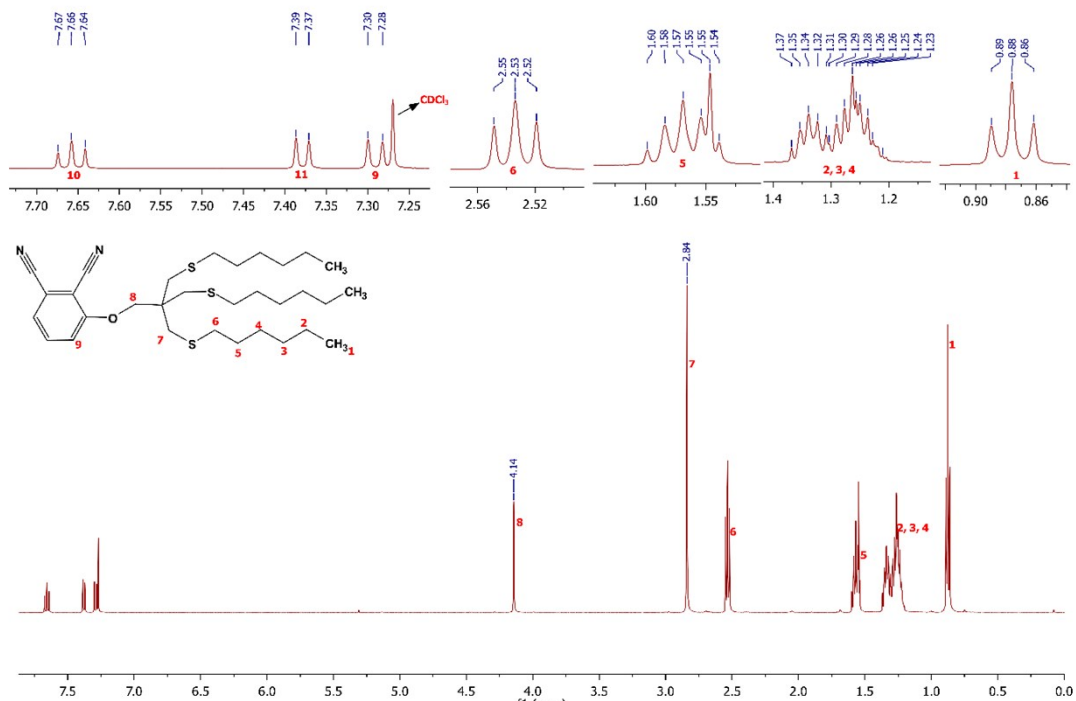

Figure S5.  $^1\text{H}$  NMR spectrum of compound 6

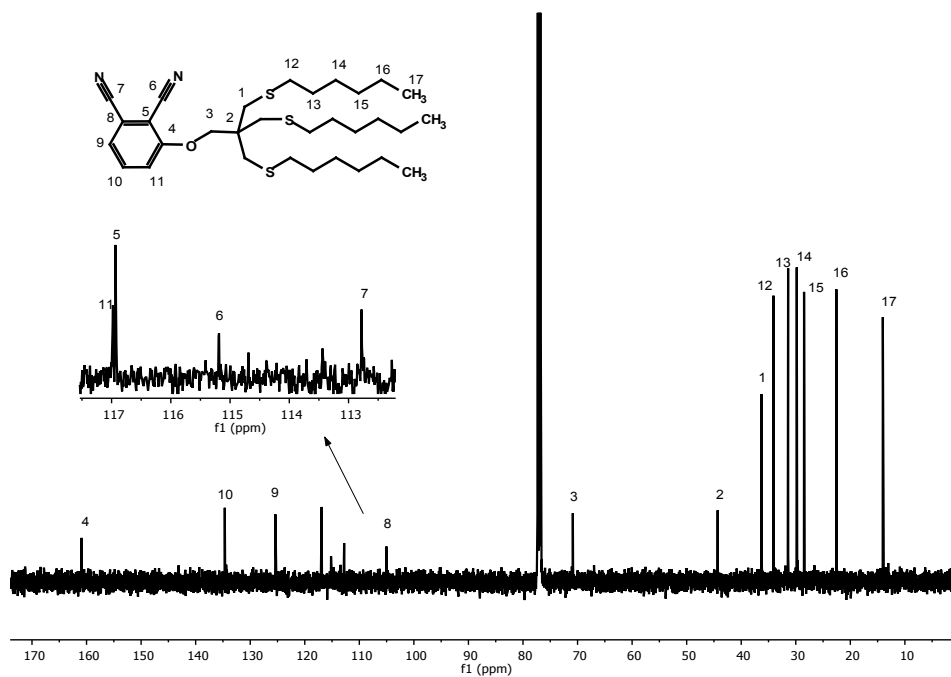

Figure S6.  $^{13}\text{C}$  NMR spectrum of compound 6

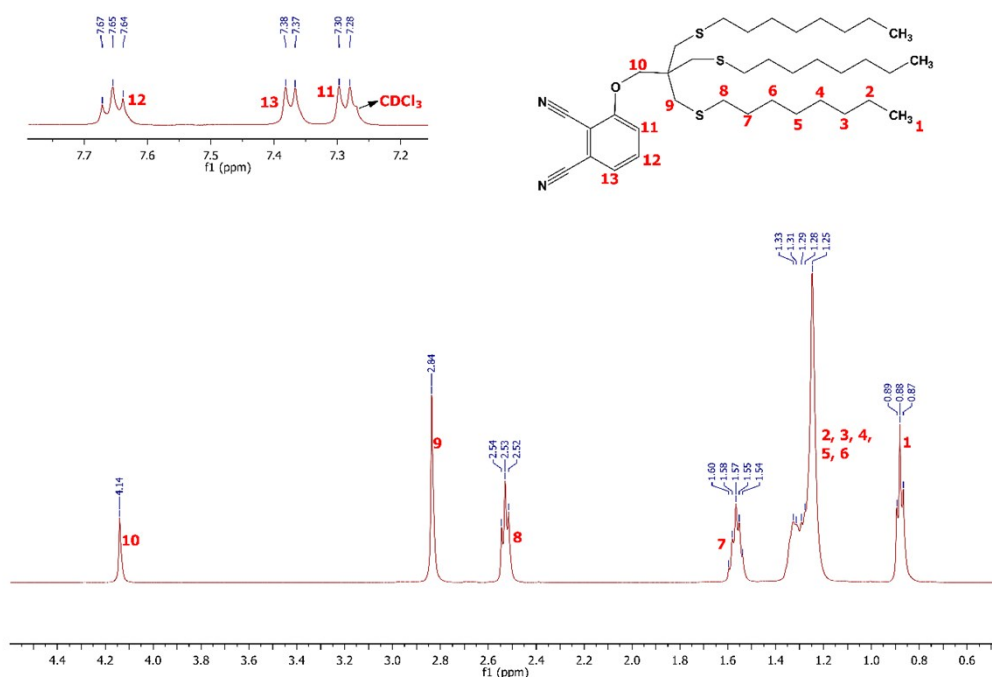

Figure S7.  $^1\text{H}$  NMR spectrum of compound 7

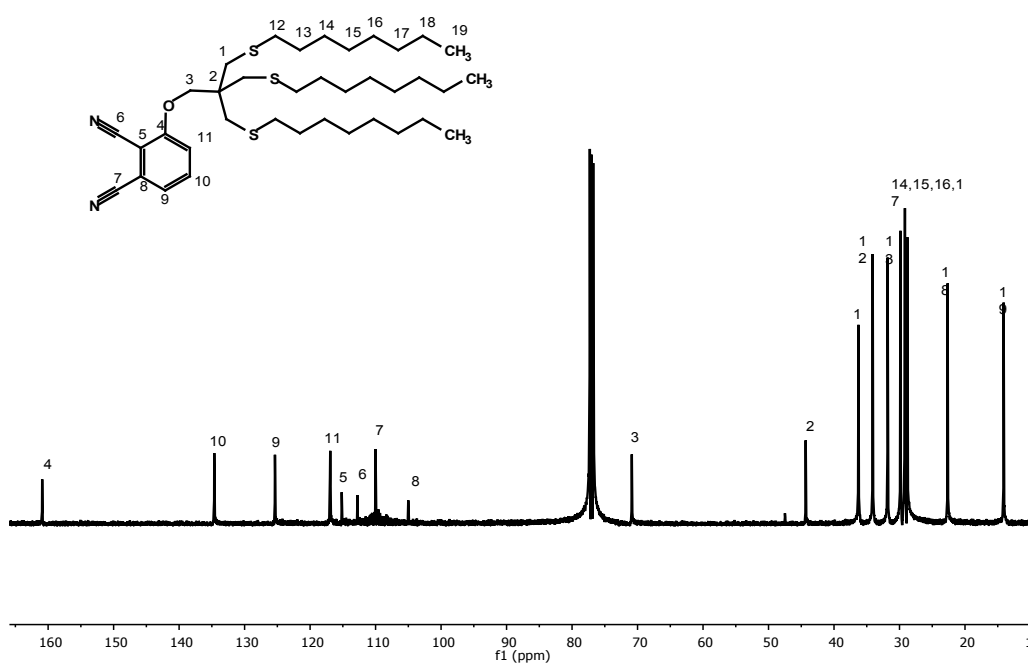

Figure S8.  $^{13}\text{C}$  NMR spectrum of compound 7

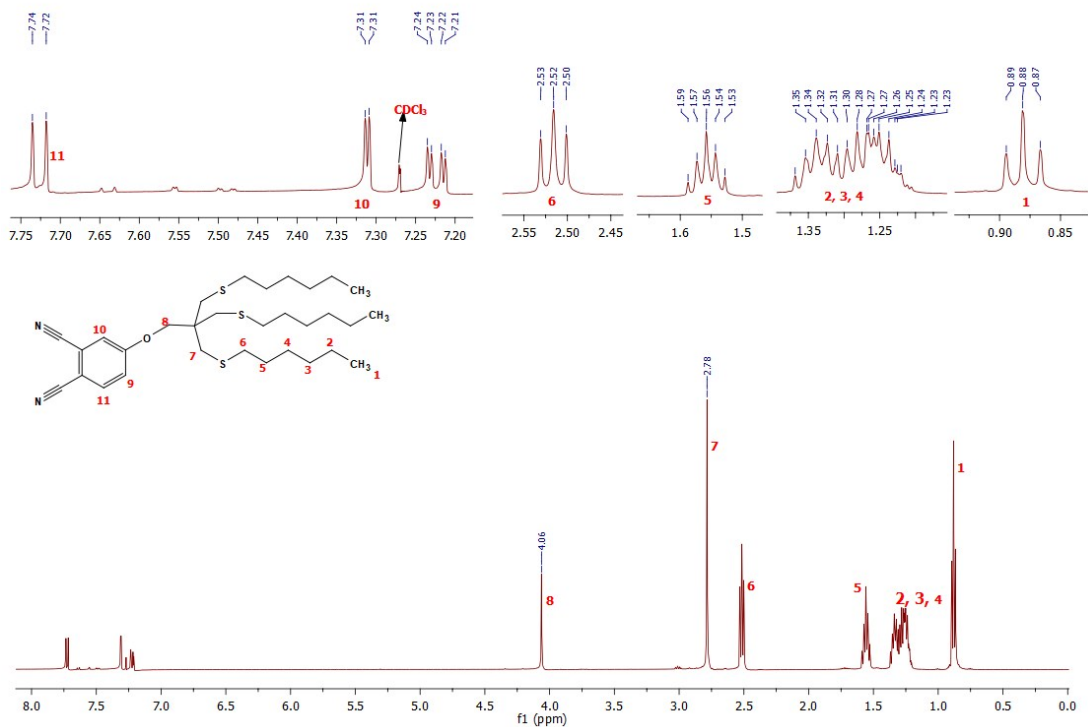

Figure S9.  $^1\text{H}$  NMR spectrum of compound **8**

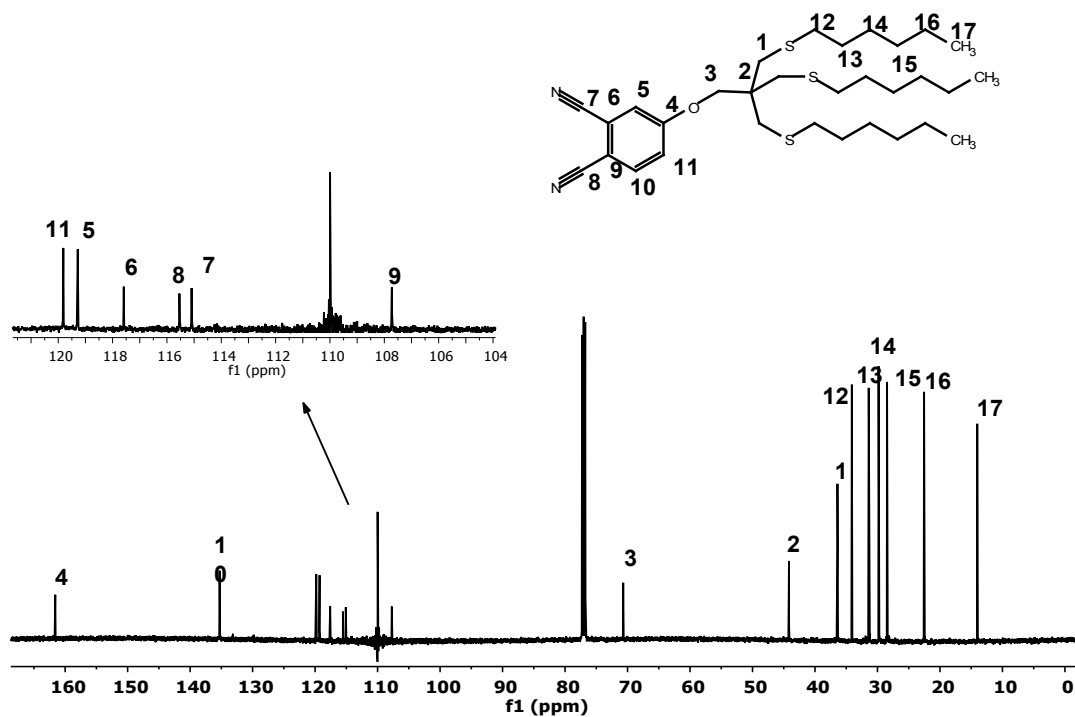

Figure S10.  $^{13}\text{C}$  NMR spectrum of compound **8**

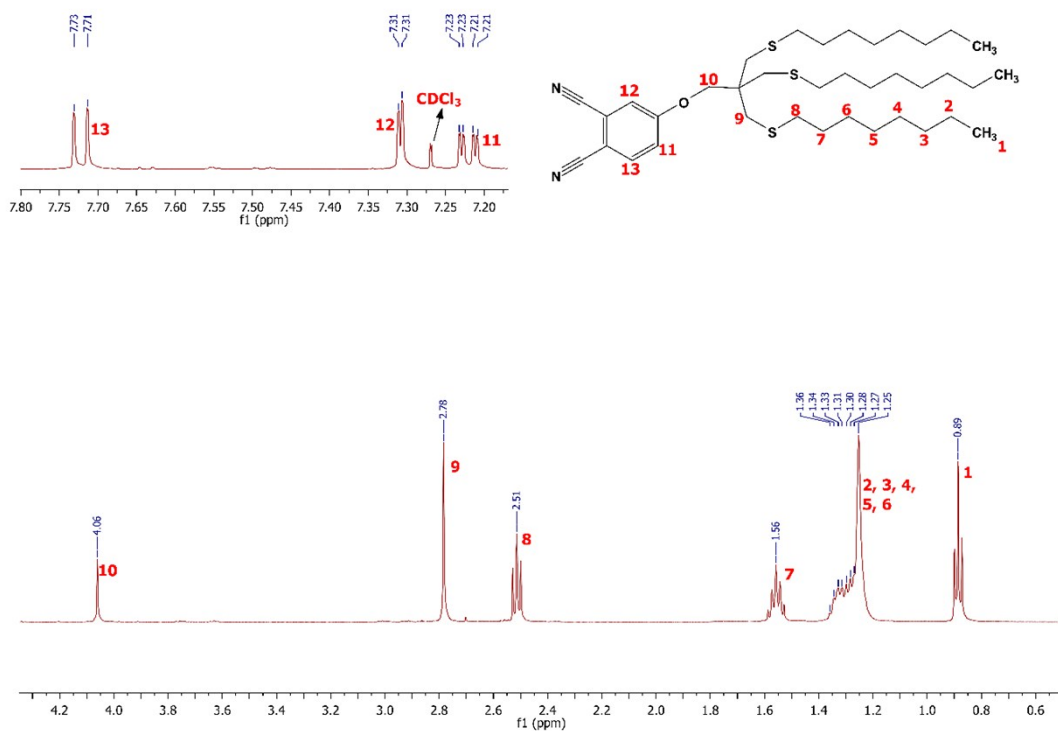

Figure S9. <sup>1</sup>H NMR spectrum of compound 9

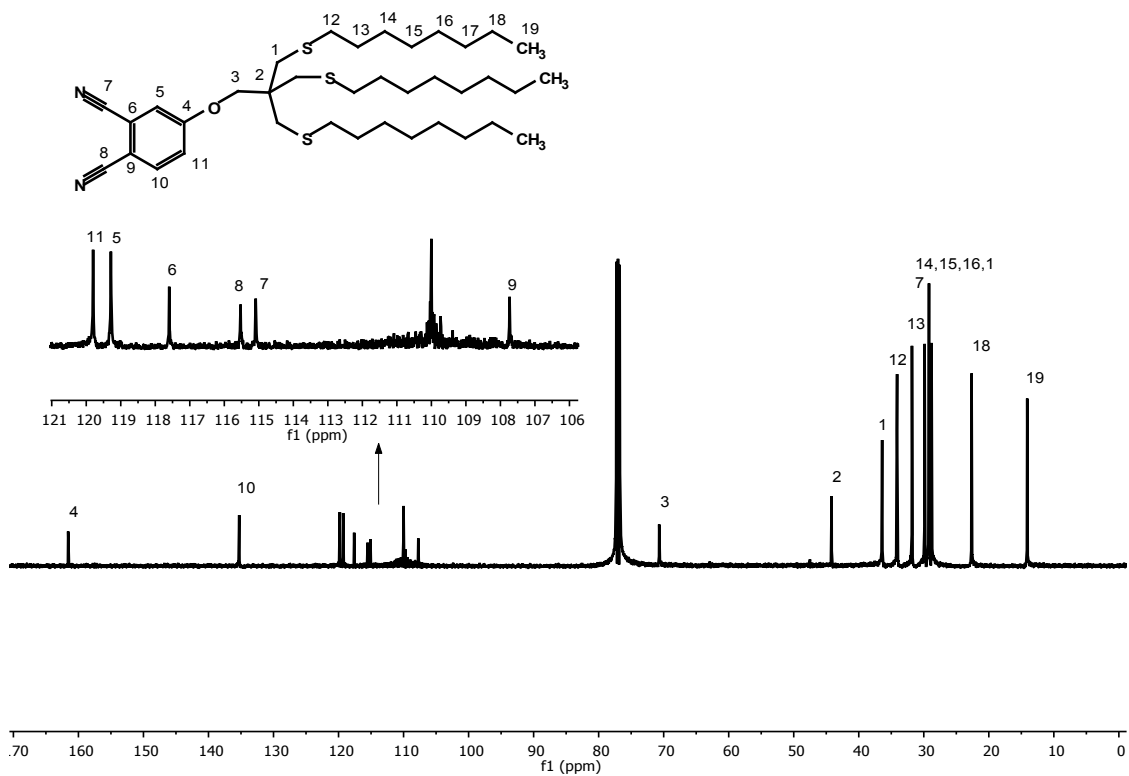

Figure S10. <sup>13</sup>C NMR spectrum of compound 9

| <b>Table S1. Selected bond parameters for compounds 4 and 5</b> |           |                 |          |
|-----------------------------------------------------------------|-----------|-----------------|----------|
| <b>Bond Lengths (Å)</b>                                         |           |                 |          |
| <b>4</b>                                                        |           | <b>5</b>        |          |
| Br1-C11                                                         | 1.962(9)  | Br1-C11         | 1.929(5) |
| Br2-C12                                                         | 1.954(10) | Br2-C12         | 1.939(5) |
| Br3-C13                                                         | 1.954(11) | Br3-C13         | 1.952(5) |
| O1-C4                                                           | 1.334(13) | O1-C1           | 1.346(6) |
| O1-C9                                                           | 1.431(12) | O1-C9           | 1.444(6) |
| N1-C1                                                           | 1.121(14) | N1-C7           | 1.135(6) |
| N2-C2                                                           | 1.149(13) | N2-C8           | 1.138(7) |
| C1-C8                                                           | 1.454(14) | C1-C2           | 1.388(6) |
| C2-C3                                                           | 1.428(14) | C1-C6           | 1.402(7) |
| C3-C4                                                           | 1.415(14) | C2-C3           | 1.380(7) |
| C3-C8                                                           | 1.411(15) | C3-C4           | 1.398(6) |
| C4-C5                                                           | 1.385(14) | C3-C7           | 1.448(7) |
| C5-C6                                                           | 1.397(15) | C4-C5           | 1.386(7) |
| C6-C7                                                           | 1.381(15) | C4-C8           | 1.435(7) |
| C7-C8                                                           | 1.384(14) | C5-C6           | 1.368(7) |
| C10-C9                                                          | 1.540(15) | C9-C10          | 1.510(6) |
| C10-C11                                                         | 1.546(13) | C10-C11         | 1.527(6) |
| C10-C12                                                         | 1.546(13) | C10-C12         | 1.524(6) |
| C10-C13                                                         | 1.538(15) | C10-C13         | 1.523(6) |
| <b>Bond Angles (°)</b>                                          |           |                 |          |
| C4-O1-C9                                                        | 120.3(8)  | C1-O1-C9        | 117.4(3) |
| N1-C1-C8                                                        | 178.5(12) | N1-C7-C3        | 179.1(6) |
| N2-C2-C3                                                        | 178.8(11) | N2-C4-C8        | 178.6(6) |
| C10-C11-Br1                                                     | 112.5(7)  | C10-C11-Br1     | 114.2(3) |
| C10-C12-Br2                                                     | 113.7(7)  | C10-C12-Br2     | 114.5(3) |
| C10-C13-Br3                                                     | 114.3(7)  | C10-C13-Br3     | 114.3(3) |
| <b>Dihedral Angles (°)</b>                                      |           |                 |          |
| C4-O1-C9-C10                                                    | 179.3(8)  | C1-O1-O9-C10    | 178.0(5) |
| C9-C10-C11-Br1                                                  | 57.4(10)  | C9-C10-C11-Br1  | 57.0(5)  |
| C9-C10-C12-Br2                                                  | 58.9(10)  | C9-C10-C12-Br2  | -64.3(5) |
| C9-C10-C13-Br3                                                  | 173.3(6)  | C9-C10-C13-Br3  | 177.9(3) |
| C12-C10-C11-Br1                                                 | -64.2(10) | C12-C10-C11-Br1 | 177.8(3) |
| C11-C10-C12-Br2                                                 | -178.8(7) | C11-C10-C12-Br2 | 175.1(3) |
| C11-C10-C13-Br3                                                 | 54.2(10)  | C11-C10-C13-Br3 | -61.1(5) |
| C13-C10-C11-Br1                                                 | 173.1(7)  | C13-C10-C11-Br1 | -59.8(5) |
| C13-C10-C12-Br2                                                 | -59.1(11) | C13-C10-C12-Br2 | 53.4(5)  |
| C12-C10-C13-Br3                                                 | -66.4(10) | C12-C10-C13-Br3 | 56.1(5)  |

| <b>Table S2 inter molecular interactions in the X-ray structures of 4</b> |                |                  |                  |                |                      |
|---------------------------------------------------------------------------|----------------|------------------|------------------|----------------|----------------------|
| <b>D-H...A</b>                                                            | <b>D-H (Å)</b> | <b>H...A (Å)</b> | <b>D...A (Å)</b> | <b>DHA (°)</b> | <b>Symmetry code</b> |
| <b>C2-H2...O1</b>                                                         | 0.93           | 2.47             | 3.384 (7)        | 168.4          | 1-x,1-y,1-z          |



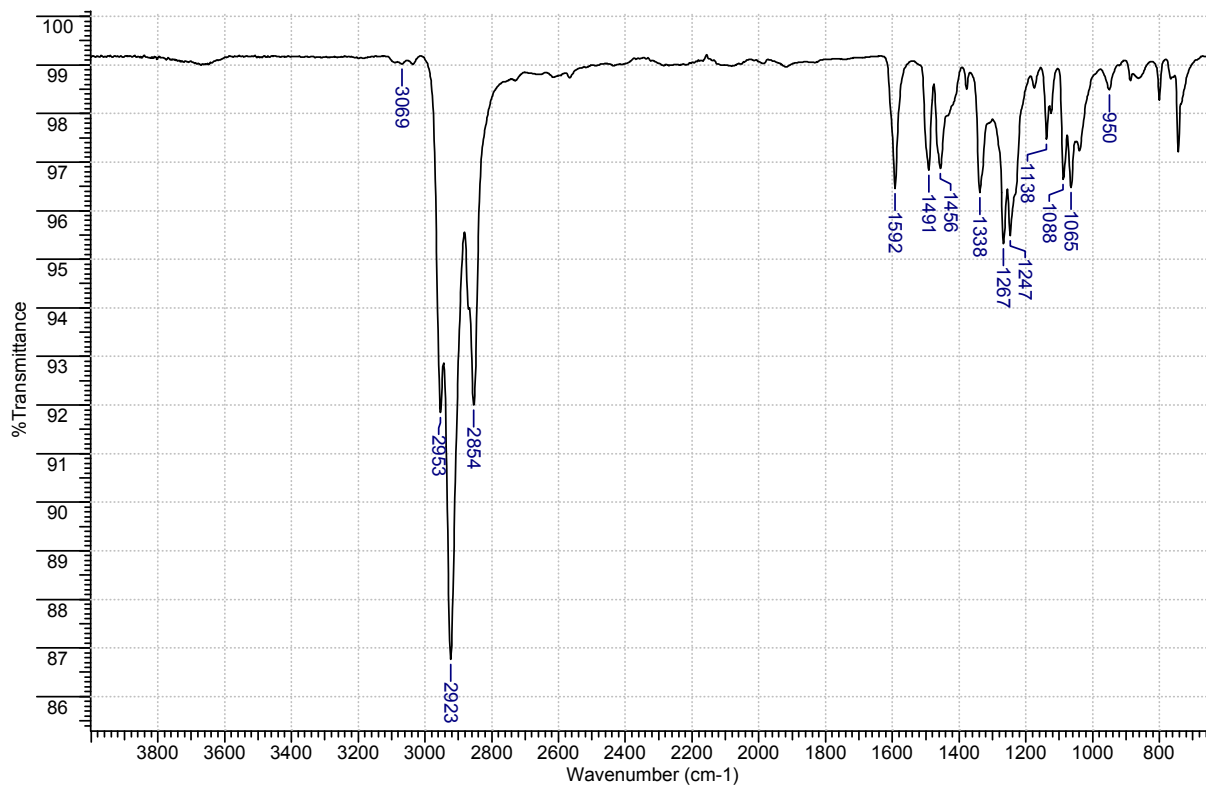

Figure S11. FT-IR spectrum of compound 10a

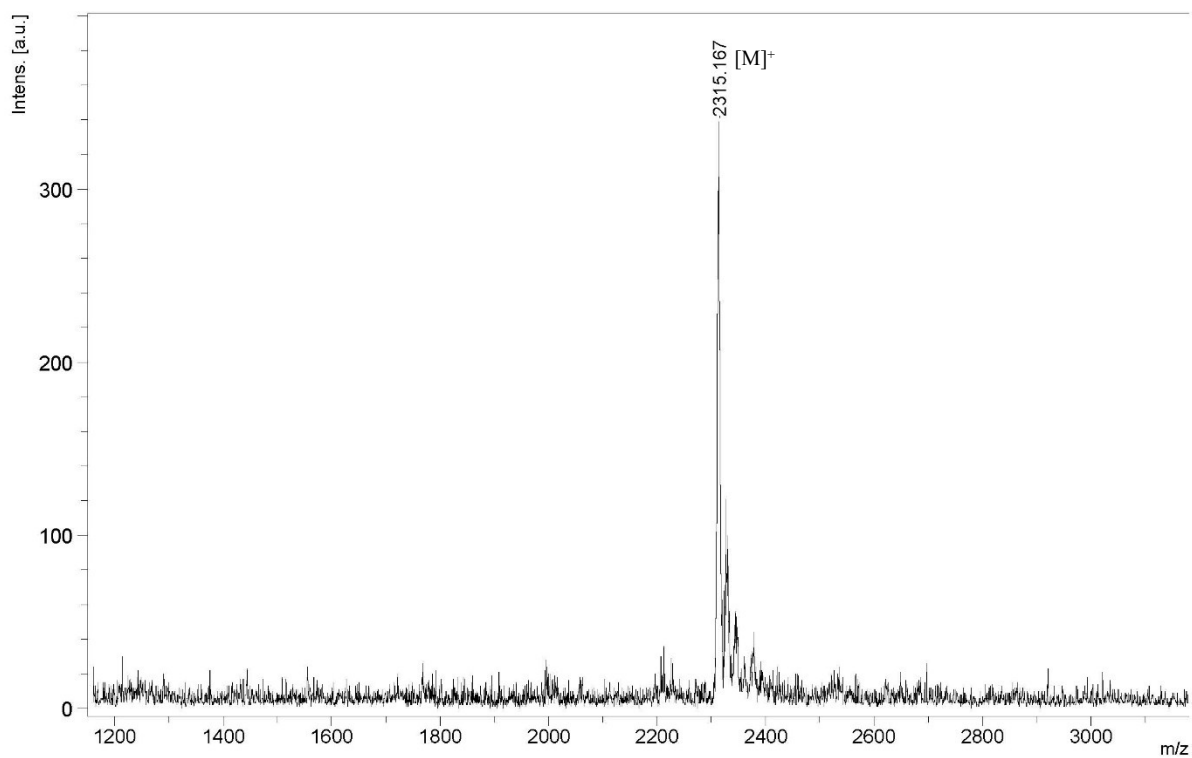

Figure S12. MALDI-TOF spectrum of compound 10a

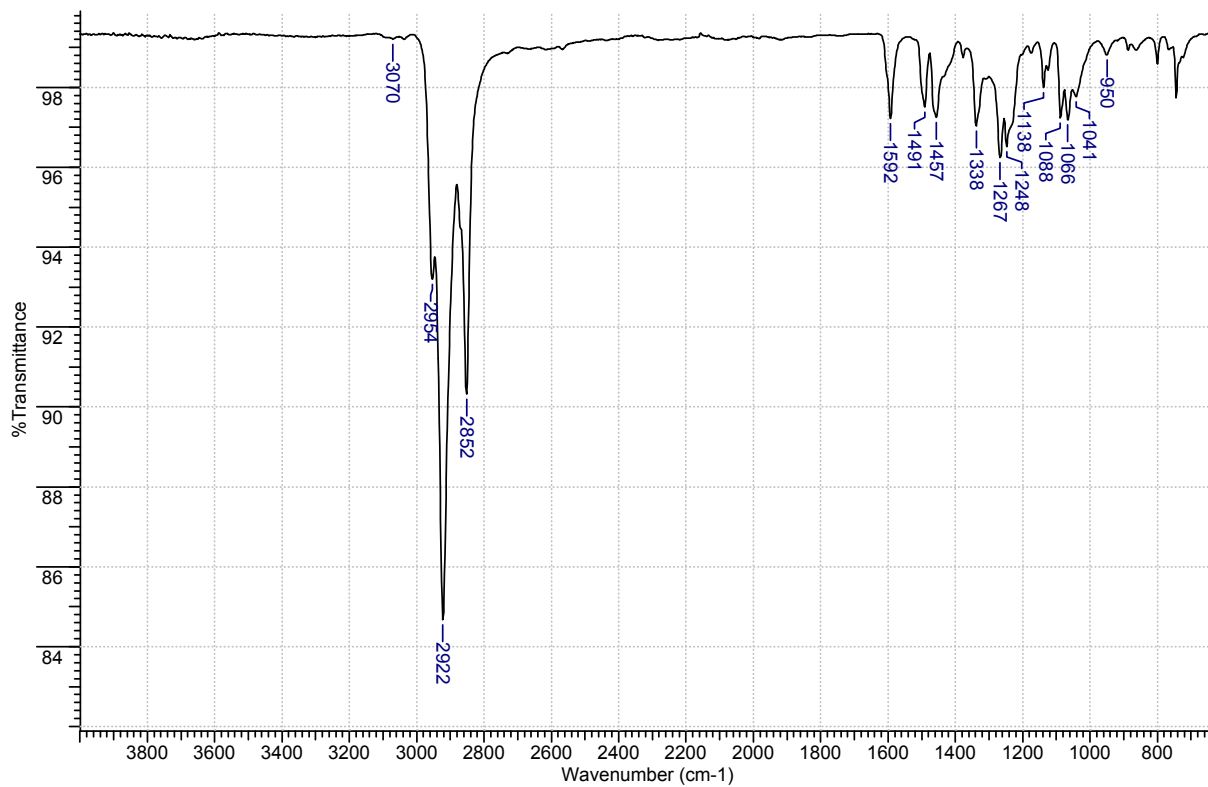

Figure S13. FT-IR spectrum of compound 10b

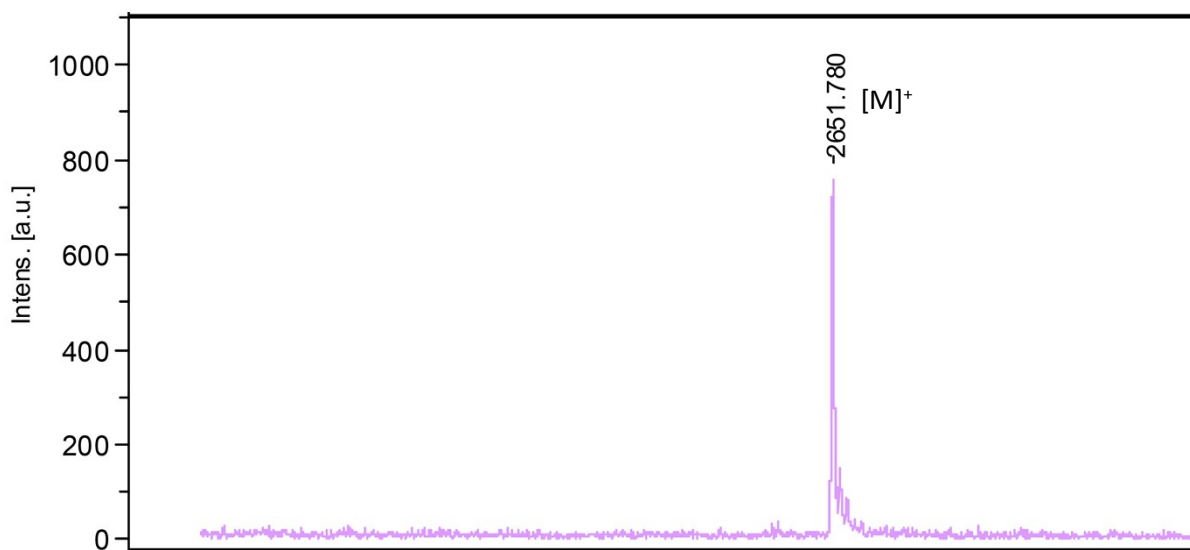

Figure S14. MALDI-TOF spectrum of compound 10b

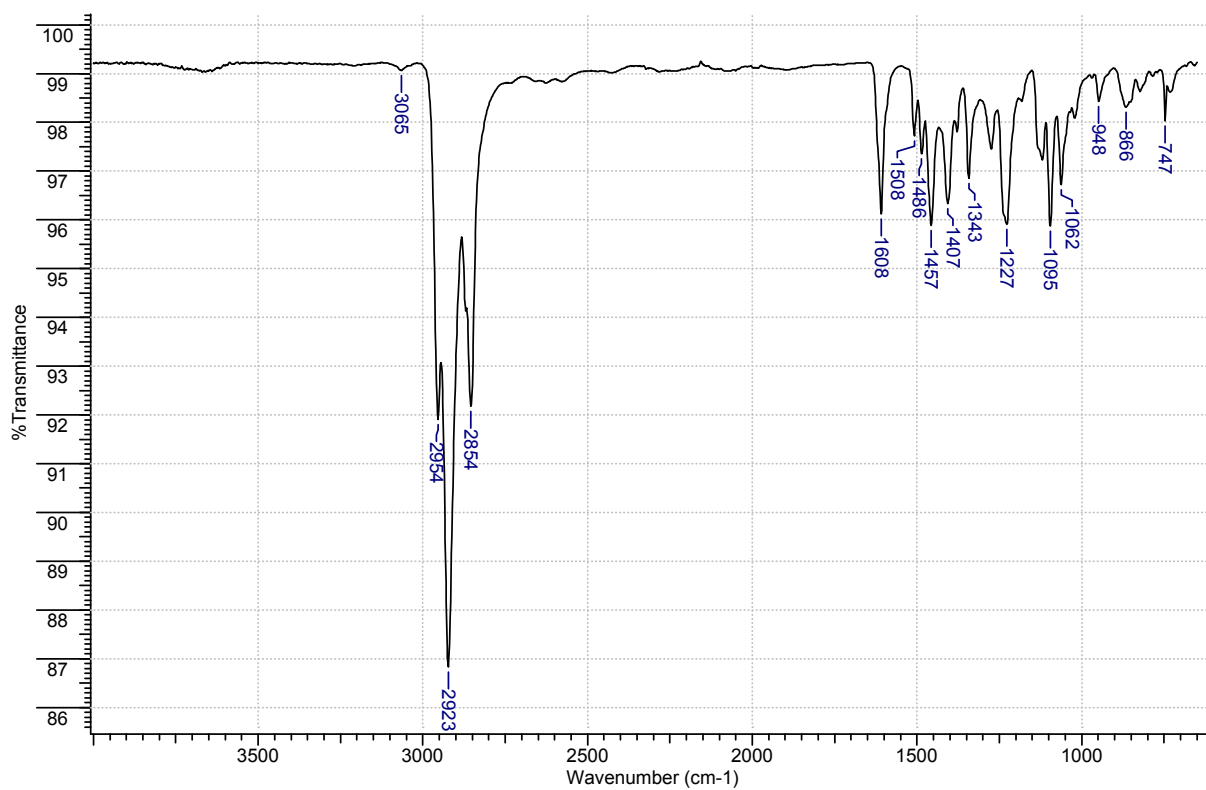

Figure S15. FT-IR spectrum of compound 11a

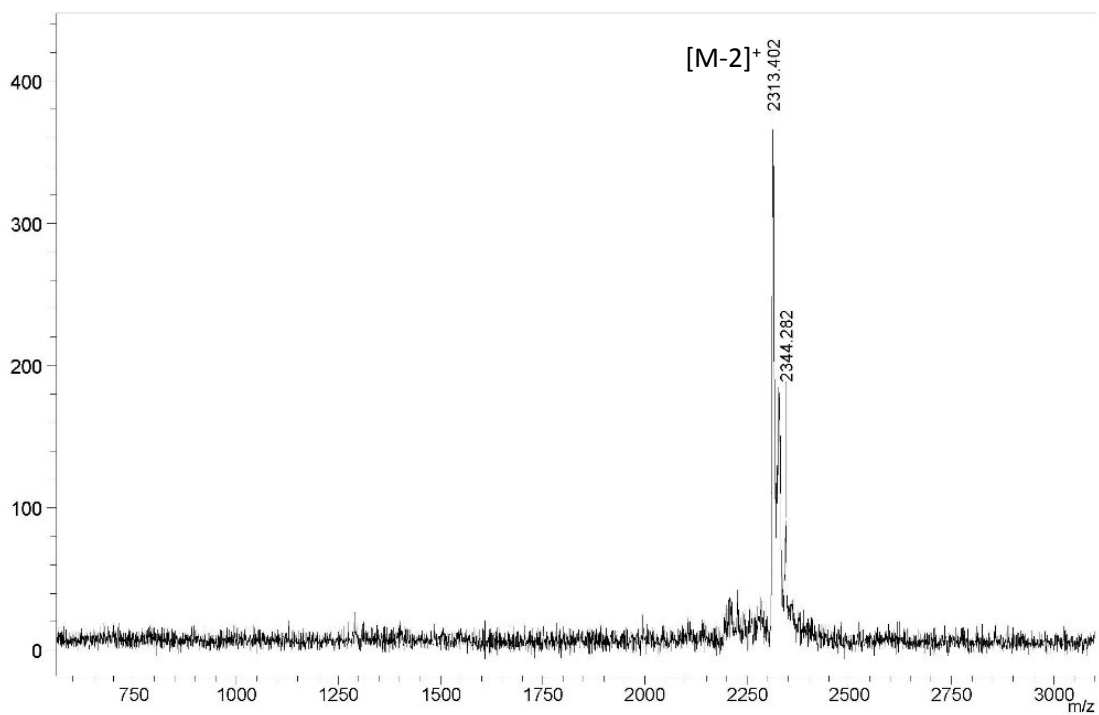

Figure S16. MALDI-TOF spectrum of compound 11a

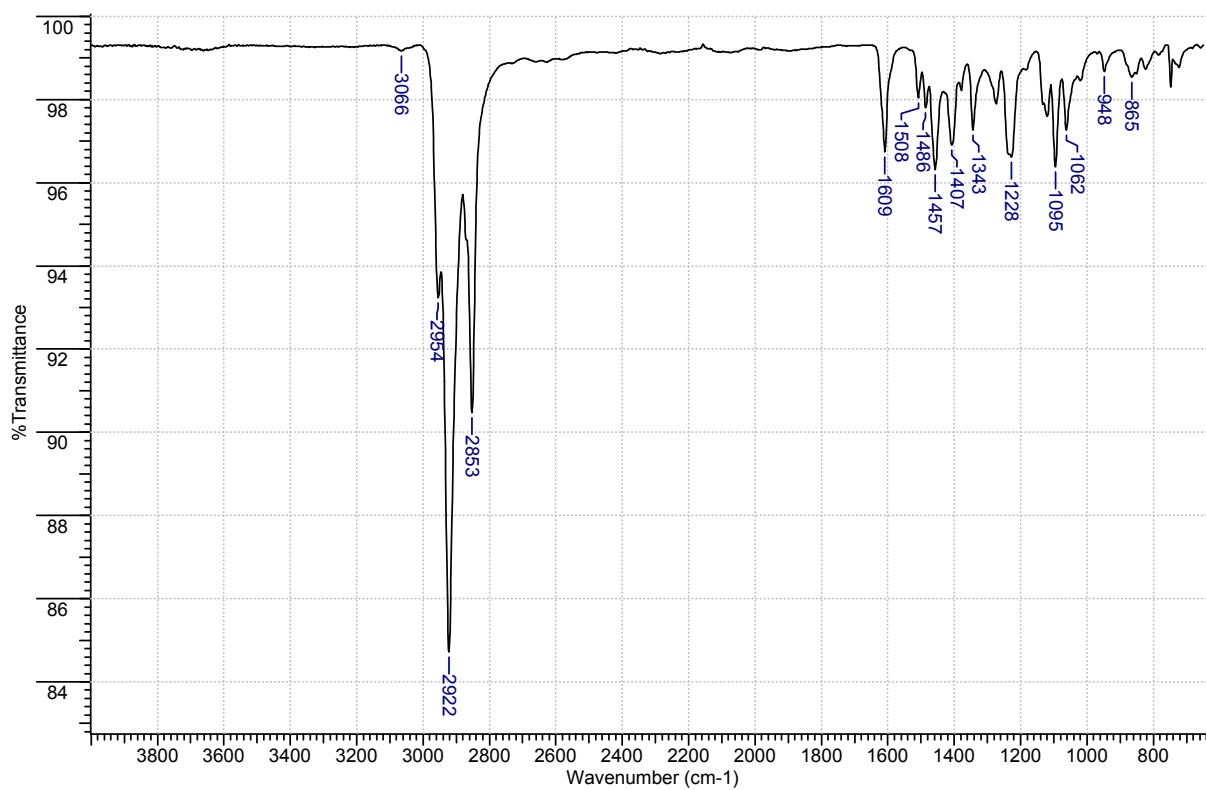

**Figure S17.** FT-IR spectrum of compound **11b**

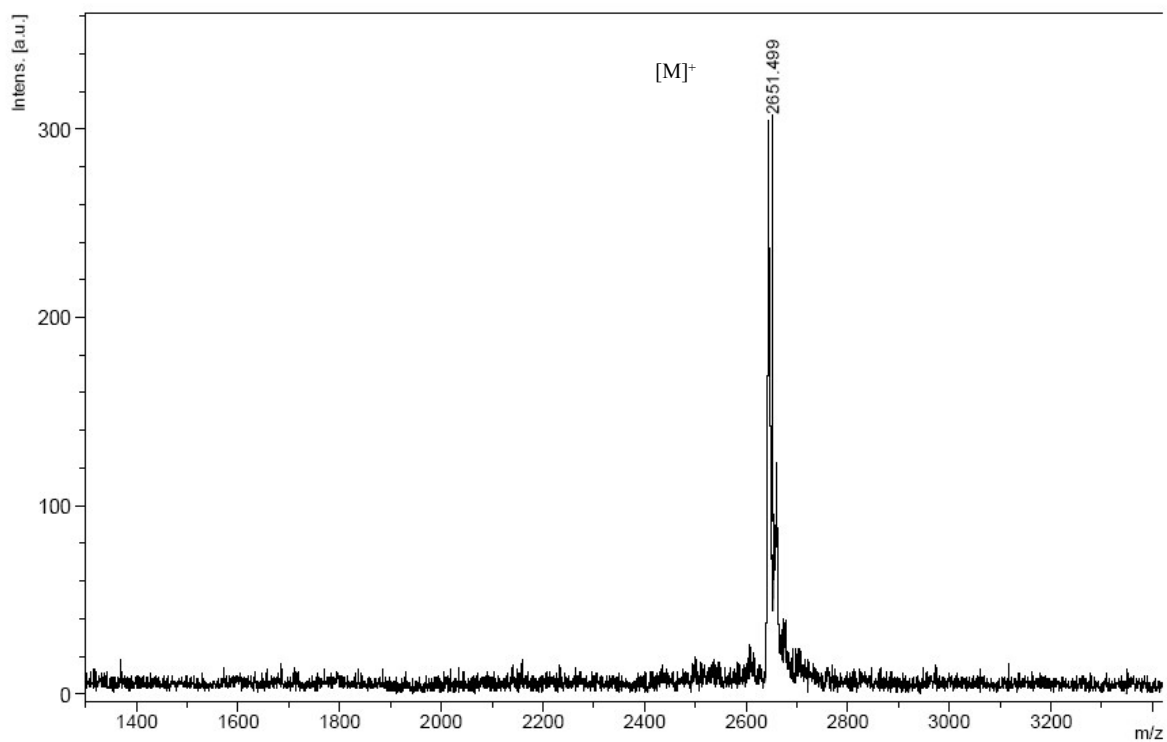

**Figure S18.** MALDI-TOF spectrum of compound **11b**

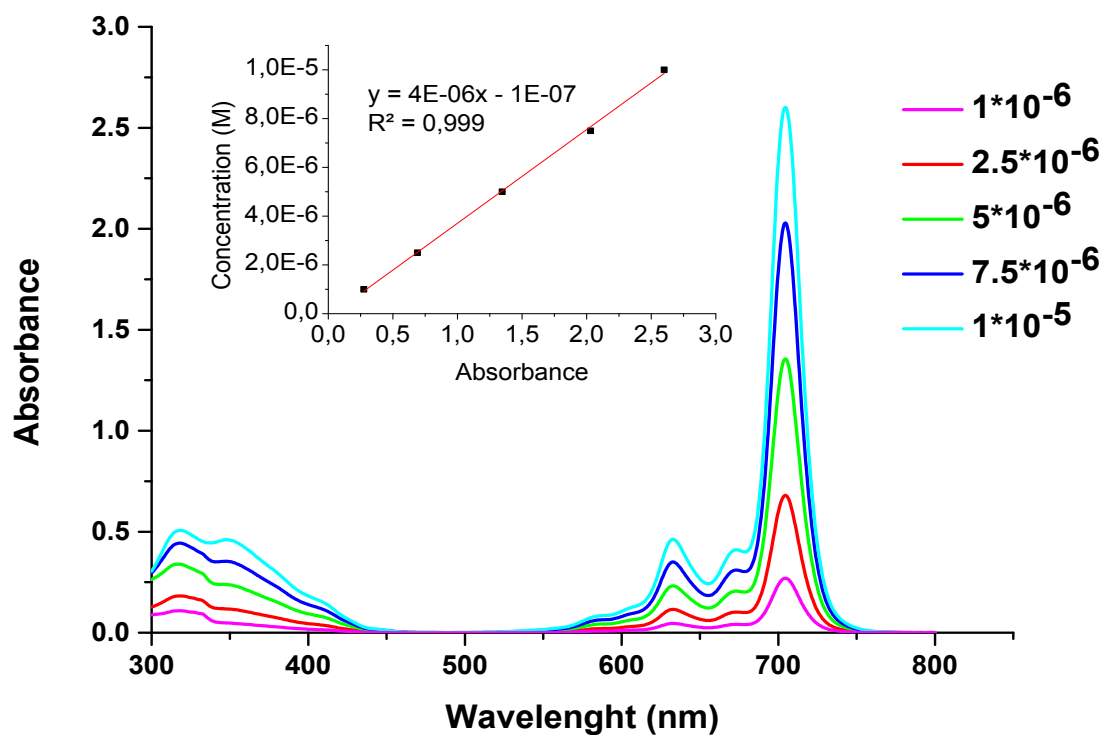

Fig. S19 Absorption spectra of THF solution of compound **10a** in different concentration

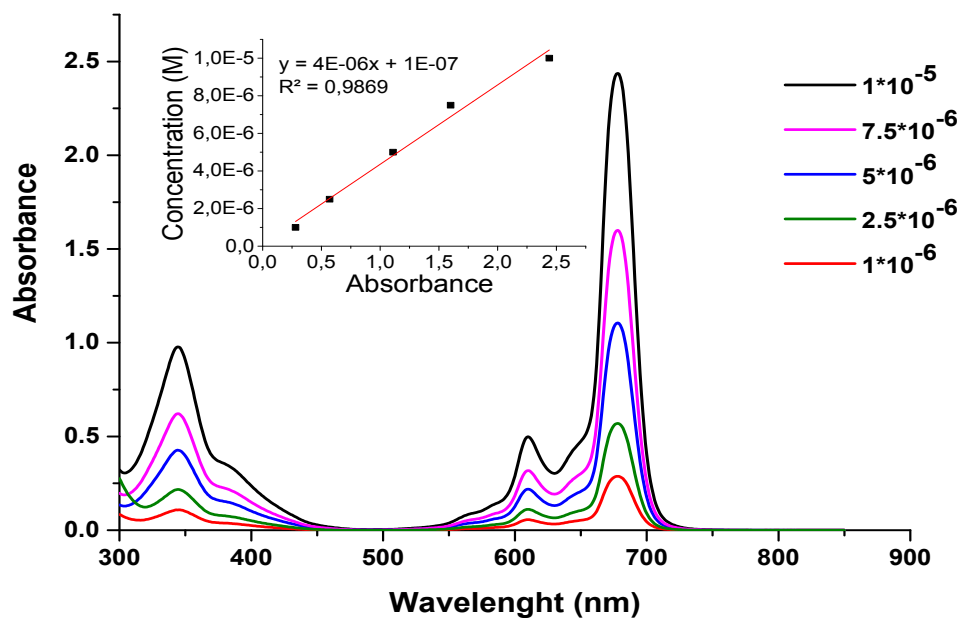

Fig. S20 Absorption spectra of THF solution of compound **11a** in different concentration

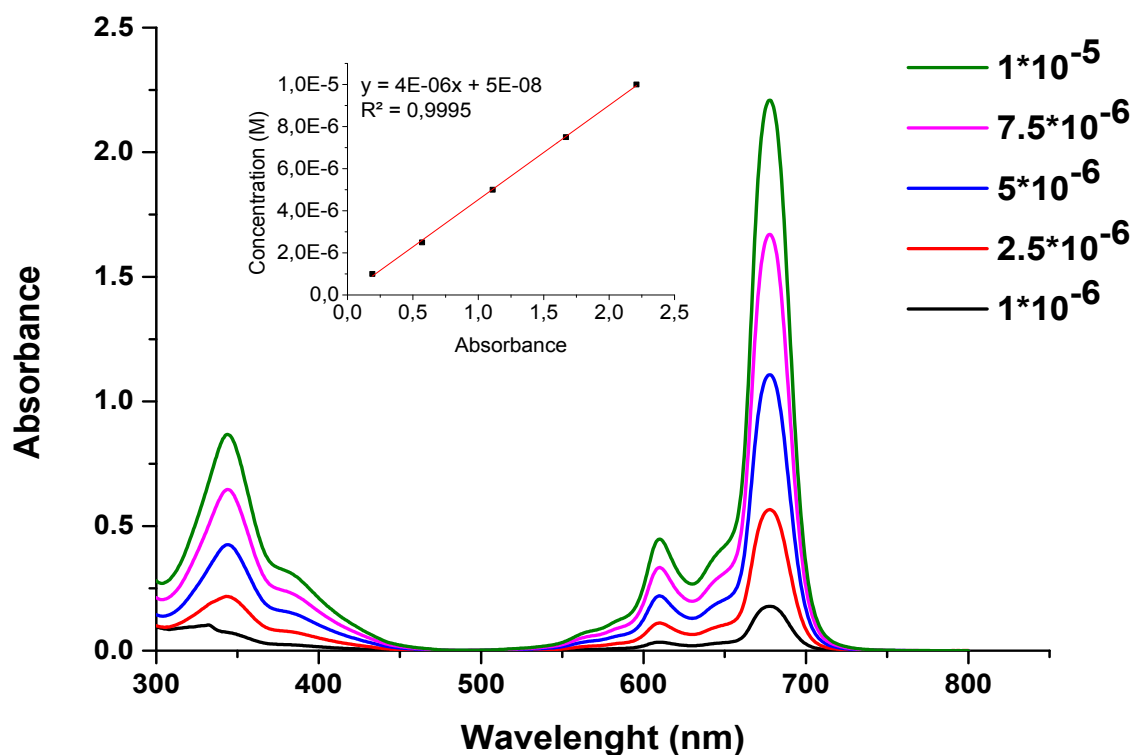

Fig. S21 Absorption spectra of THF solution of compound **11b** in different concentration

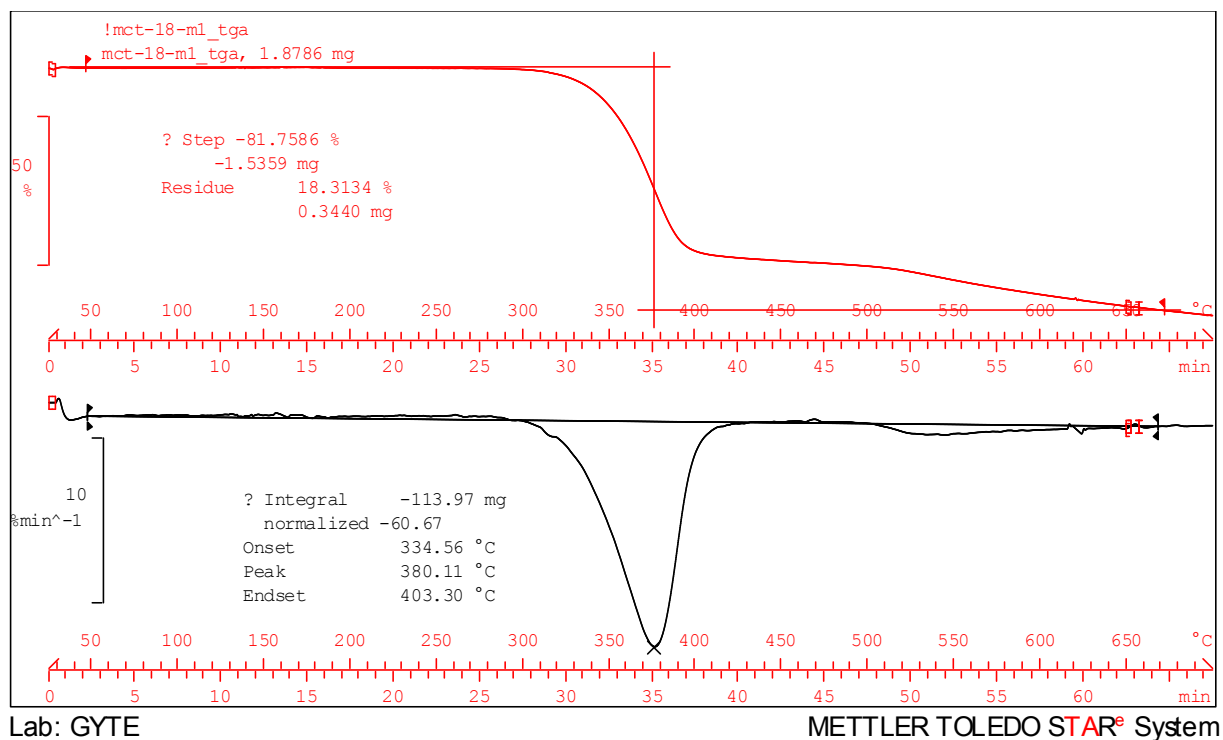

Fig. S22 TGA thermogram of **10a**.

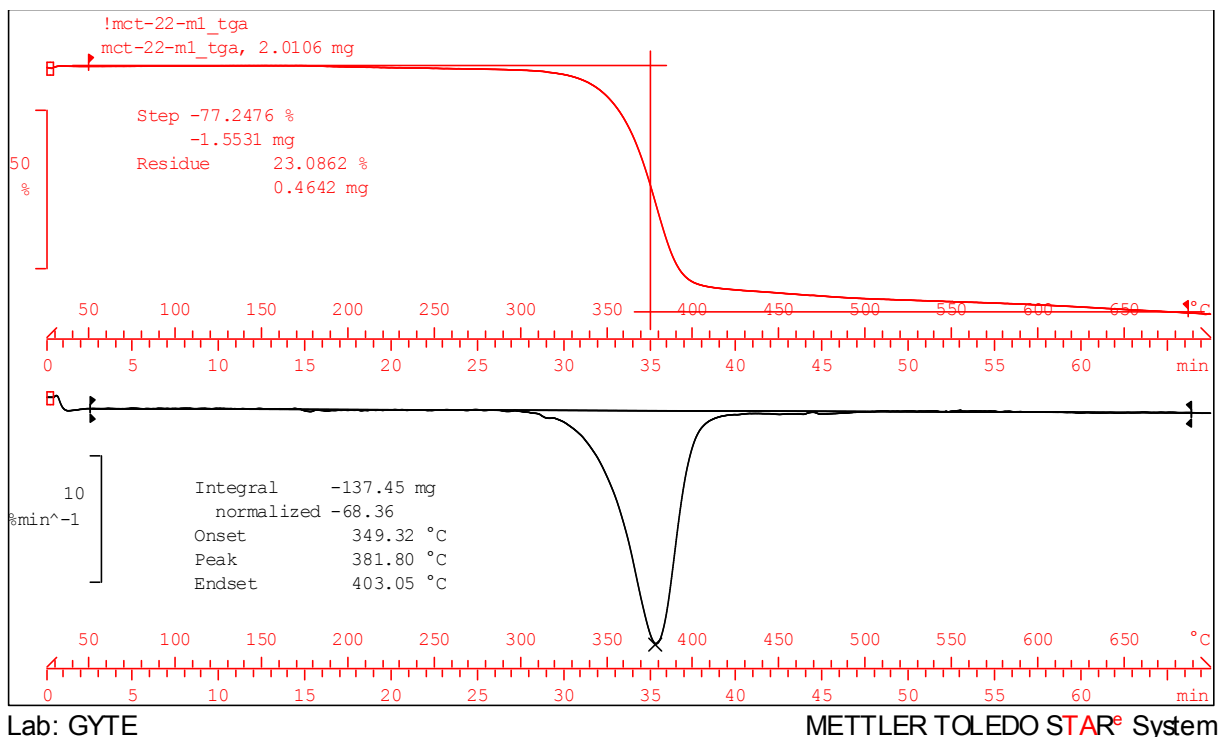

Fig. S23 TGA thermogram of 10b.

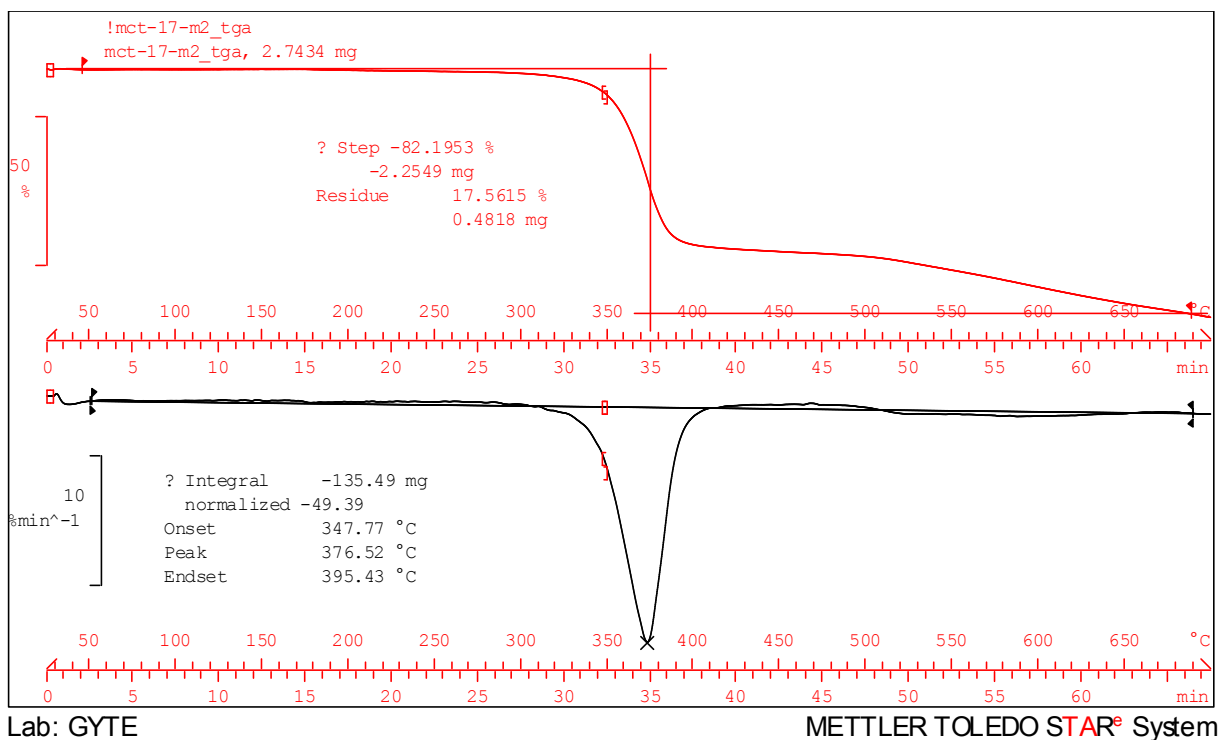

Fig. S24 TGA thermogram of 11a.

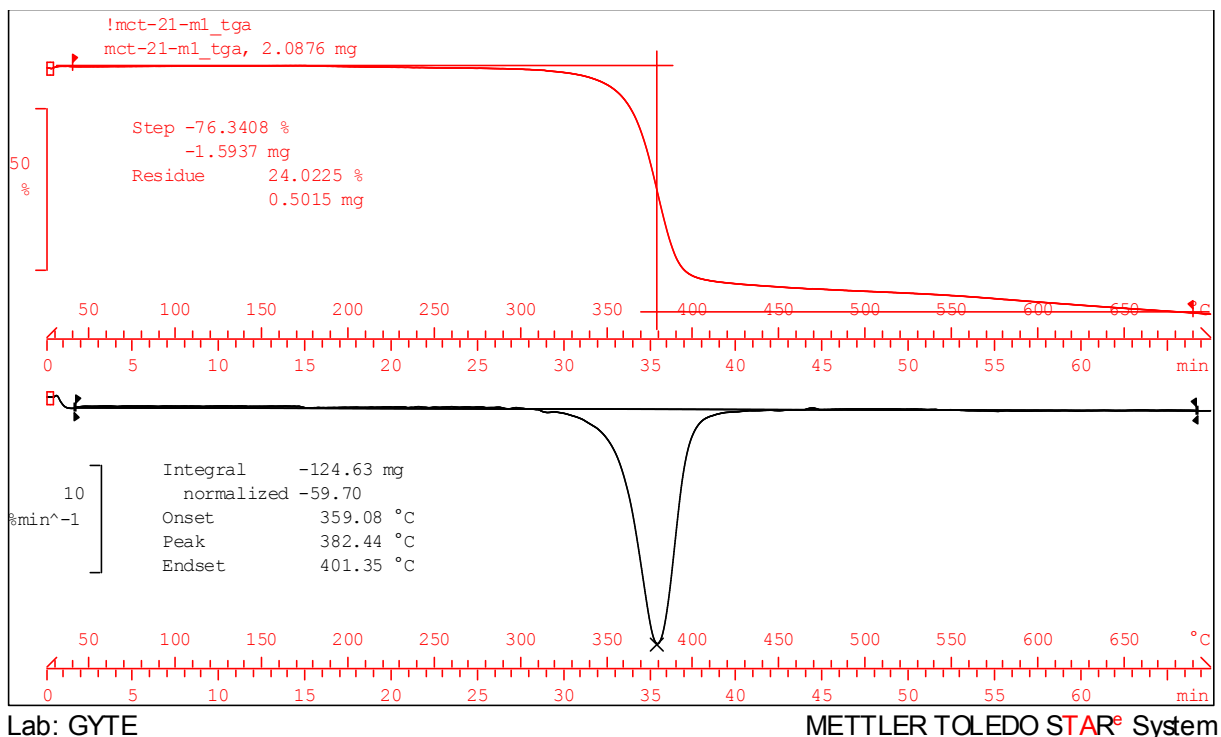

Fig. S25 TGA thermogram of 11b.

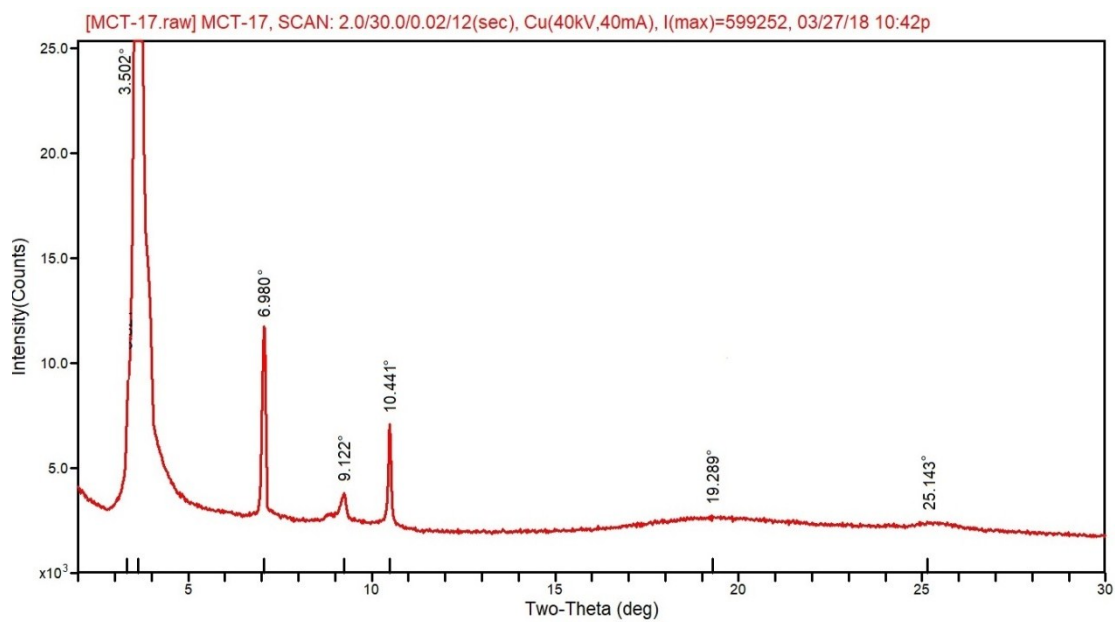

Fig. S26 XRD pattern of 11a.



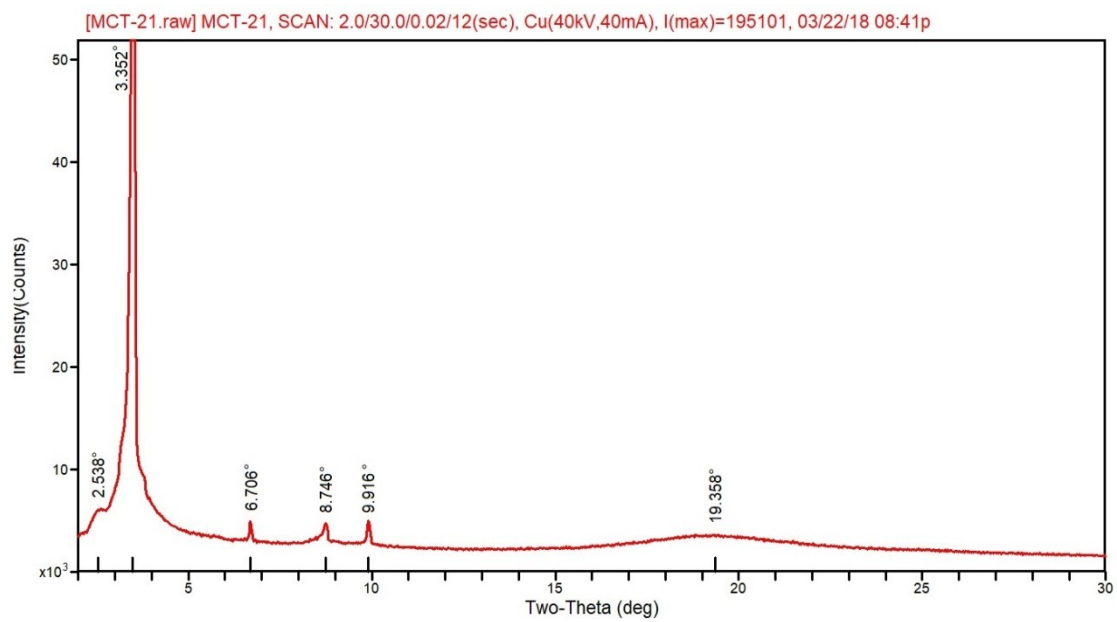

**Fig. S27** XRD pattern of **11b**.
